# Supplementary material for: Group Contribution Revisited: The Enthalpy of Formation of Organic Compounds with “Chemical Accuracy”
Source: MDPI journal article supplement (doi:10.3390/chemengineering5020024), 2021-05-11
Supplement: s1 [file s1]

# Supplementary Material

to

## Group contribution revisited: the enthalpy of formation of organic compounds with “chemical accuracy”

by Robert J. Meier

Table S1. Experimental (CAPEC data base and NIST data base) and increments (difference between experimental value for the species and that of the species with 1 CH<sub>2</sub> group less, so the previous entry in the table).

| Alcohols       | CAPEC<br>incr. | NIST   | NIST incr. |
|----------------|----------------|--------|------------|
| Ethanol        |                | -234   |            |
| 1-Propanol     | -20.25         | -256   | -22.00     |
| 1-Butanol      | -19.40         | -277   | -21.00     |
| 2-Butanol      |                | -293   |            |
| 1-Pentanol     | -22.30         | -298   | -21.00     |
| 2-Pentanol     |                | -314   |            |
| 3-Pentanol     |                |        |            |
| 1-Hexanol      | -19.60         | -316   | -18.00     |
| 1-Heptanol     | -19.90         | -334.5 | -18.50     |
| 2-Heptanol     |                |        |            |
| 1-Octanol      | -20.20         | -356   | -21.50     |
| 1-Nonanol      | -24.60         | -377.9 | -21.90     |
| 1-Decanol      | -20.10         | -395   | -17.10     |
| 1-Undecanol    | -20.70         |        |            |
| 1-Dodecanol    | -17.50         | -436.5 | -20.75     |
| 1-Tetradecanol | -20.75         | -474.8 | -19.15     |
| 1-Eicosanol    | -20.70         |        |            |

Table S2. Experimental and model values for alkanes. All values in kJ/mol. When available, Rossini et al. data [21] were used when comparing with the present model (model – exp), otherwise CAPEC data (not shown) were used. The last rows with values in red are the average increment for the Rossini data set (-20.63 kJ/mol), whereas the value in the last row (0.53) is the averaged absolute difference between the model Eq. (2) and the experimental values.

| <b>n-alkanes</b>                    | Rossini | Rossini<br>incr. | NIST   | model $\Delta H_f$ | model-exp | ABS<br>(model-exp) |
|-------------------------------------|---------|------------------|--------|--------------------|-----------|--------------------|
| ethane                              | -84.73  |                  | -84    | -84.72             | 0.01      | 0.01               |
| propane                             | -103.92 | -19.19           | -104.7 | -105.35            | -1.43     | 1.43               |
| butane                              | -124.82 | -20.90           | -126   | -125.98            | -1.16     | 1.16               |
| pentane                             | -146.55 | -21.73           | -147   | -146.61            | -0.06     | 0.06               |
| hexane                              | -167.31 | -20.76           | -167   | -167.24            | 0.07      | 0.07               |
| heptane                             | -187.95 | -20.64           | -188   | -187.87            | 0.08      | 0.08               |
| octane                              | -208.6  | -20.65           | -208.5 | -208.5             | 0.10      | 0.1                |
| nonane                              | -229.2  | -20.60           | -228.3 | -229.13            | 0.07      | 0.07               |
| decane                              | -249.84 | -20.64           | -249.7 | -249.76            | 0.08      | 0.08               |
| undecane                            | -270.48 | -20.64           | -270.3 | -270.39            | 0.09      | 0.09               |
| dodecane                            | -291.1  | -20.62           | -290   | -291.02            | 0.08      | 0.08               |
| tridecane                           | -311.72 | -20.62           | -311.5 | -311.65            | 0.07      | 0.07               |
| tetradecane                         | -332.36 | -20.64           | -332.1 | -332.28            | 0.08      | 0.08               |
| pentadecane                         | -353.01 | -20.65           | -354.8 | -352.91            | 0.10      | 0.1                |
| hexadecane                          | -373.6  | -20.59           | -374.8 | -373.54            | 0.06      | 0.06               |
| heptadecane                         | -394.21 | -20.61           | -393.9 | -394.17            | 0.04      | 0.04               |
| octadecane                          | -414.85 | -20.64           | -414.6 | -414.8             | 0.05      | 0.05               |
| nonadecane                          | -435.45 | -20.60           | -435.1 | -435.43            | 0.02      | 0.02               |
| eicosane                            | -456.1  | -20.65           | -455.8 | -456.06            | 0.04      | 0.04               |
| heneicosane                         |         |                  |        | -476.69            | 1.21      | 1.21               |
| docosane                            |         |                  |        | -497.32            | 1.18      | 1.18               |
| dotriacontane                       |         |                  |        | -517.95            | 1.25      | 1.25               |
| tetracosane                         |         |                  |        | -538.58            | 1.42      | 1.42               |
| pentacosane                         |         |                  |        | -559.21            | 1.49      | 1.49               |
| hexacosane                          |         |                  |        | -579.84            | 1.56      | 1.56               |
| octacosane                          |         |                  |        | -621.1             | -1.10     | 1.1                |
| triacontane                         |         |                  |        | -662.36            | -1.36     | 1.36               |
| dotriacontane                       |         |                  |        | -703.62            | -1.62     | 1.62               |
| hexatriacontane                     |         |                  |        | -786.14            | -1.14     | 1.14               |
| <b>averaged increment</b>           |         | <b>-20.63</b>    |        |                    |           |                    |
| <b>averaged absolute difference</b> |         |                  |        |                    |           | <b>0.53</b>        |

Table S3. Experimental and model values for mono-methylalkanes. All values in kJ/mol. When available, Rossini et al. data [21] were used when comparing with the present model (model – exp), otherwise NIST data, and when both were not available CAPEC data (not shown). The red value 1.91 kJ/mol in the last row is the averaged absolute difference between the model Eq. (3) and the experimental values.

| <b>Monomethyl alkanes</b>    | Rossini | NIST   | NIST incr. | model $\Delta H_f$ | model-exp | ABS<br>(model-exp) |
|------------------------------|---------|--------|------------|--------------------|-----------|--------------------|
| 2-methylpropane              | -131.7  | -134.9 |            | -131.08            | 0.62      | 0.62               |
| 2-methylbutane               | -154.6  | -154.1 | -19.20     | -151.71            | 2.89      | 2.89               |
| 2-methylpentane              | -174.43 | -174.3 | -20.20     | -172.34            | 2.09      | 2.09               |
| 3-methylpentane              | -171.8  | -171.6 |            | -172.34            | -0.54     | 0.54               |
| 3-methylhexane               | -192.4  | -192.5 |            | -192.97            | -0.57     | 0.57               |
| 2-methylhexane               | -195.1  | -195.5 | -21.20     | -192.97            | 2.13      | 2.13               |
| 3-methylheptane              | -212.78 | -212.6 |            | -213.6             | -0.82     | 0.82               |
| 4-methylheptane              | -212.24 | -212.1 |            | -213.6             | -1.36     | 1.36               |
| 2-methylheptane              | -215.63 | -215.5 | -20.00     | -213.6             | 2.03      | 2.03               |
| 2-methyloctane               |         |        |            | -234.23            | 1.67      | 1.67               |
| 4-methyloctane               |         |        |            | -234.23            | 0.97      | 0.97               |
| 2-methylnonane               |         | -260.2 | -22.35     | -254.86            | 5.34      | 5.34               |
| 5-methylnonane               |         | -258.6 |            | -254.86            | 3.74      | 3.74               |
| averaged absolute difference |         |        |            |                    |           | 1.91               |

Table S4. Experimental and model values for the n-alcohols. All values in kJ/mol. The model was compared (model-exp) using the NIST data when available and otherwise from the CAPEC data base data. The value in the last column (1.54 kJ/mol) is the averaged absolute difference between the model Eq. (4a+4b) and experimental data.

| <b>n-Alcohols</b>            | NIST   | model $\Delta H_f$ | model-exp | ABS<br>(model-exp) |
|------------------------------|--------|--------------------|-----------|--------------------|
| ethanol                      | -234   | -233.99            | 0.96      | 0.96               |
| 1-propanol                   | -256   | -254.62            | 0.58      | 0.58               |
| 1-butanol                    | -277   | -275.25            | -0.65     | 0.65               |
| 2-butanol                    | -293   | -296.98            | -4.08     | 4.08               |
| 1-pentanol                   | -298   | -295.88            | 1.02      | 1.02               |
| 2-pentanol                   | -314   | -317.61            | -3.81     | 3.81               |
| 3-pentanol                   |        | -317.61            | -0.88     | 0.88               |
| 1-hexanol                    | -316   | -316.51            | -0.01     | 0.01               |
| 1-heptanol                   | -334.5 | -337.14            | -0.74     | 0.74               |
| 2-heptanol                   |        | -358.87            | -3.47     | 3.47               |
| 1-octanol                    | -356   | -357.77            | -1.17     | 1.17               |
| 1-nonanol                    | -377.9 | -378.4             | 2.80      | 2.8                |
| 1-decanol                    | -395   | -399.03            | 2.27      | 2.27               |
| 1-undecanol                  |        | -419.66            | 2.34      | 2.34               |
| 1-dodecanol                  | -436.5 | -440.29            | -0.79     | 0.79               |
| 1-tetradecanol               | -474.8 | -481.55            | -0.55     | 0.55               |
| 1-eicosanol                  |        | -605.33            | -0.13     | 0.13               |
| averaged absolute difference |        |                    |           | 1.54               |

Table S5. Experimental and model values for the aldehydes. All values in kJ/mol. Experimental data were taken from the CAPEC data base (please note, see Ref. 15, that explicit values were never published in the open literature). Note the very small differences between model and experimental values for this series.

| <b>Aldehydes</b>             | model $\Delta H_f$ | model-exp | ABS<br>(model-exp) |
|------------------------------|--------------------|-----------|--------------------|
| acetaldehyde                 | -166.36            | -0.16     | 0.16               |
| butanal                      | -207.62            | -0.62     | 0.62               |
| pentanal                     | -228.25            | -0.45     | 0.45               |
| hexanal                      | -248.88            | -0.28     | 0.28               |
| heptanal                     | -269.51            | -0.11     | 0.11               |
| octanal                      | -290.14            | 0.06      | 0.06               |
| nonanal                      | -310.77            | 0.13      | 0.13               |
| decanal                      | -331.4             | 0.30      | 0.3                |
| dodecanal                    | -372.66            | 0.64      | 0.64               |
| averaged absolute difference |                    |           | <b>0.31</b>        |

Table S6. Experimental and model values for the ketones. All values in kJ/mol. The averaged absolute difference between the experimental NIST data base values and the present model is 1.10 kJ/mol.

| <b>Ketones (2-alkanones)</b> | NIST    | model $\Delta H_f$ | model-exp | ABS<br>(model-exp) |
|------------------------------|---------|--------------------|-----------|--------------------|
| 2-propanone                  | -218.00 | -217.72            | 0.28      | 0.28               |
| 2-butanone                   | -238.50 | -238.35            | 0.15      | 0.15               |
| 2-pentanone                  | -259.10 | -258.98            | 0.12      | 0.12               |
| 2-hexanone                   | -279.98 | -279.61            | 0.37      | 0.37               |
| 2-nonanone                   | -340.80 | -341.50            | -0.70     | 0.70               |
| 3-pentanone                  | -257.00 | -258.98            | -1.98     | 1.98               |
| 3-hexanone                   | -278.25 | -279.61            | -1.36     | 1.36               |
| 4-heptanone                  | -298.3  | -300.24            | -1.94     | 1.94               |
| 2-nonanone                   | -340.8  | -341.50            | -0.70     | 0.70               |
| 5-nonanone                   | -344.9  | -341.50            | 3.40      | 3.40               |
| averaged absolute difference |         |                    |           | <b>1.10</b>        |

Table S7. Experimental and model values for mono- and dicarboxylic acids. All values in kJ/mol. Experimental values were taken from NIST for comparison with model values, and if not available CAPEC data base values were used.

| <b>Carboxylic acids</b>      | NIST   | NIST incr. | model $\Delta H_f$ | model-exp | ABS<br>(model-exp) |
|------------------------------|--------|------------|--------------------|-----------|--------------------|
| acetic acid                  | -433   |            | -433.36            | -0.36     | 0.36               |
| propanoic acid               | -455.8 | -22.8      | -453.99            | 1.81      | 1.81               |
| butanoic acid                | -475.9 | -20.1      | -474.62            | 1.28      | 1.28               |
| pentanoic acid               | -491   | -15.1      | -495.25            | 1.25      | 1.25               |
| hexanoic acid                | -512   | -21        | -515.88            | -0.78     | 0.78               |
| heptanoic acid               | -538.6 | -26.6      | -536.51            | 2.09      | 2.09               |
| octanoic acid                | -555   | -16.4      | -557.14            | -2.14     | 2.14               |
| nonanoic acid                | -578   | -23        | -577.77            | 0.23      | 0.23               |
| decanoic acid                |        |            | -598.4             | -4.10     | 4.1                |
| undecanoic acid              |        |            | -619.03            | -0.03     | 0.03               |
| dodecanoic acid              |        |            | -639.66            | 0.34      | 0.34               |
| tetradecanoic acid           |        |            | -680.92            | 0.08      | 0.08               |
| nonadecanoic acid            |        |            | -784.07            | -0.07     | 0.07               |
| averaged absolute difference |        |            |                    |           | 1.12               |
| propanedioic acid            |        |            | -802.63            | -1.43     | 1.43               |
| butanedioic acid             |        |            | -823.26            | -0.36     | 0.36               |
| pentanedioic acid            |        |            | -843.89            | -1.29     | 1.29               |
| hexanedioic acid             |        |            | -864.52            | 0.48      | 0.48               |
| averaged absolute difference |        |            |                    |           | 0.89               |

Table S8. Experimental and model values for methyl (upper part) and other di-alkyl ethers (lower part). All values in kJ/mol. For the comparison between model and experiment NIST data were used but if not available CAPEC data base values.

| Methyl-alkyl-Ethers          | NIST   | model ΔHf  | model-exp | ABS<br>(model-exp) |                    |
|------------------------------|--------|------------|-----------|--------------------|--------------------|
| dimethylether                | -184.1 | -175       | 9.10      | 9.10               |                    |
| ethyl methyl ether           | -216.4 | -217.36    | -0.96     | 0.96               |                    |
| methyl propyl ether          |        | -237.99    | 0.21      | 0.21               |                    |
| methyl n-butyl ether         |        | -258.62    | -0.52     | 0.52               |                    |
| decyl methyl ether           | -381.1 | -382.4     | -1.30     | 1.30               |                    |
| averaged absolute difference |        |            |           | 2.42               |                    |
| Di-alkyl ethers              | NIST   | NIST incr. | model ΔHf | model-exp          | ABS<br>(model-exp) |
| diethylether                 | -252   |            | -252.72   | -0.72              | 0.72               |
| di-n-propylether             | -296   | -44        | -293.98   | 2.02               | 2.02               |
| di-n-butylether              | -334   | -38        | -335.24   | -1.24              | 1.24               |
| di-n-pentylether             | -390   | -56        | -376.5    | 13.50              | 13.50              |
| di-n-hexylether              |        |            | -417.76   | -2.26              | 2.26               |
| ethyl propyl ether           |        |            | -273.35   | -1.15              | 1.15               |
| averaged absolute difference |        |            |           |                    | 3.48               |

Table S9. Experimental and model values for alkenes. All values in kJ/mol. The absolute average deviation between model and experimental data is only 0.17 kJ/mol when we adopt the data from Rossini et al. [22, 23].

| <b>1-Alkenes</b>                | Rossini | Rossini<br>incr. | NIST   | model $\Delta H_f$ | model-exp | ABS<br>(model-<br>exp) |
|---------------------------------|---------|------------------|--------|--------------------|-----------|------------------------|
| ethylene                        | 52.32   |                  | 52.4   | 62.5               |           |                        |
| 1-propene                       | 20.43   | -31.89           | 20.4   | 20.14              | -0.29     | 0.29                   |
| 1-butene                        | 1.17    | -19.26           | -0.63  | -0.49              | -1.66     | 1.66                   |
| 1-pentene                       | -20.94  | -22.11           | -22    | -21.12             | -0.19     | 0.19                   |
| 1-hexene                        | -41.70  | -20.77           | -42    | -41.75             | -0.05     | 0.05                   |
| 1-heptene                       | -62.34  | -20.64           | -63    | -62.38             | -0.04     | 0.04                   |
| 1-octene                        | -82.99  | -20.64           | -82.9  | -83.01             | -0.02     | 0.02                   |
| 1-nonene                        | -103.59 |                  |        | -103.64            | -0.05     | 0.05                   |
| 1-decene                        | -124.23 | -20.64           | -124.5 | -124.27            | -0.04     | 0.04                   |
| 1-undecene                      | -144.87 |                  |        | -144.9             | -0.03     | 0.03                   |
| 1-dodecene                      | -165.47 | -20.60           | -165.3 | -165.53            | -0.06     | 0.06                   |
| 1-tridecene                     | -186.11 |                  |        | -186.16            | -0.05     | 0.05                   |
| 1-tetradecene                   | -206.75 |                  |        | -206.79            | -0.04     | 0.04                   |
| 1-pentadecene                   | -227.40 |                  |        | -227.42            | -0.02     | 0.02                   |
| 1-hexadecene                    | -248.00 | -20.60           | -248.4 | -248.05            | -0.05     | 0.05                   |
| 1-octadecene                    | -289.24 |                  |        | -289.31            | -0.07     | 0.07                   |
| 1-eicosene                      | -330.48 |                  |        | -330.57            | -0.09     | 0.09                   |
| averaged absolute<br>difference |         |                  |        |                    |           | 0.17                   |

Table S10. Experimental and model values for the 2-enes and 3-enes. All values in kJ/mol. The averaged absolute difference between the experimental and model values was calculated as 0.55 kJ/mol, adopting the Rossini et al. values and if not available NIST data and for trans-2-octene from the CAPEC data base.

| <b>2-, 3-alkenes</b>         | Rossini | NIST   | model $\Delta H_f$ | model-exp | ABS<br>(model-exp) |
|------------------------------|---------|--------|--------------------|-----------|--------------------|
| trans-2-butene               | -10.07  | -10.80 | -11.22             | -1.15     | 1.15               |
| trans-2-pentene              | -31.78  | -32.00 | -31.85             | -0.07     | 0.07               |
| trans-2-hexene               | -52.59  | -48.00 | -52.48             | 0.11      | 0.11               |
| trans-3-Hexene               | -52.59  | -48.00 | -52.48             | 0.11      | 0.11               |
| trans-2-heptene              |         | -73.00 | -73.11             | -0.11     | 0.11               |
| trans-3-heptene              |         | -73.00 | -73.11             | -0.11     | 0.11               |
| trans-2-octene               |         |        | -93.74             | 1.56      | 1.56               |
| cis-2-butene                 | -5.70   |        | -6.72              | -1.02     | 1.02               |
| cis-2-pentene                | -27.26  |        | -27.35             | -0.09     | 0.09               |
| cis-2-hexene                 | -48.40  |        | -47.98             | 0.42      | 0.42               |
| cis-3-hexene                 | -48.40  |        | -47.98             | 0.42      | 0.42               |
| cis-2-heptene                |         | -70.00 | -68.61             | 1.39      | 1.39               |
| averaged absolute difference |         |        |                    |           | 0.55               |

Table S11. Experimental and model values for the 1-alkenes with an alkyl substituent *not directly attached* to the double bond carbon atom. The model was compared (model-exp) using the data available from Rossini et al. [22] and if not available from the CAPEC data base. The averaged absolute difference between the model values according to Eq. (6) and the experimental values was found to be 2.54 kJ/mol.

| <b>1-Alkenes + substituent NOT at double bond</b> | Rossini | model $\Delta H_f$ | model-exp | ABS (model-exp) |
|---------------------------------------------------|---------|--------------------|-----------|-----------------|
| 3-methyl-1-butene                                 | -28.97  | -26.22             | 2.75      | 2.75            |
| 3-methyl-1-pentene                                | -46.14  | -46.85             | -0.71     | 0.71            |
| 3-ethyl-1-pentene                                 |         | -67.48             | -3.38     | 3.38            |
| 4-methyl-1-pentene                                | -48.82  | -46.85             | 1.97      | 1.97            |
| 3-methyl-1-hexene                                 |         | -63.48             | 3.21      | 3.21            |
| 4-methyl-1-hexene,                                |         | -63.48             | 3.22      | 3.22            |
| averaged absolute difference                      |         |                    |           | 2.54            |

Table S12. Experimental and model values for the 2-alkenes with an alkyl substituent *directly attached* to the double bond. The last row provides the averaged absolute difference between the experimental Rossini data [22] and our model, being 1.00 kJ/mol.

| <b>=2-Alkenes + substituent at double bond</b> | Rossini | NIST  | model $\Delta H_f$ | model-exp | ABS (model-exp) |
|------------------------------------------------|---------|-------|--------------------|-----------|-----------------|
| 2-methyl-2-butene                              | -42.6   | -41   | -42.85             | -0.25     | 0.25            |
| 2,3-dimethyl-2-butene                          | -67.6   | -70   | -68.58             | -0.98     | 0.98            |
| 2-methyl-2-pentene                             | -62.63  |       | -63.48             | -0.85     | 0.85            |
| trans-3-methyl-2-pentene                       | -65.4   | -63.5 | -63.48             | 1.92      | 1.92            |
| averaged absolute difference                   |         |       |                    |           | 1.00            |

Table S13. Experimental and model values for the 1-alkenes with an alkyl substituent directly attached to the double bond carbon atom. The last row provides the averaged absolute difference between the experimental Rossini data [22] and, if not available CAPEC data base values. The averaged absolute difference between model and experimental values was found to be 1.21 kJ/mol.

| <b>2-(M)ethyl-1-alkenes</b>  | Rossini | NIST   | model $\Delta H_f$ | model-exp | ABS<br>(model-exp) |
|------------------------------|---------|--------|--------------------|-----------|--------------------|
| 2-methyl-1-propene           | -14.00  |        | -14.72             | -0.72     | 0.72               |
| 2-methyl-1-butene            | -36.34  | -35.00 | -35.35             | 0.99      | 0.99               |
| 2-ethyl-1-butene             | -54.10  |        | -55.98             | -1.88     | 1.88               |
| 2-methyl-1-pentene           | -56.78  |        | -55.98             | 0.80      | 0.80               |
| 2-ethyl-1-pentene            |         |        | -76.61             | -1.97     | 1.97               |
| 2-methyl-1-hexene            |         |        | -76.61             | 0.62      | 0.62               |
| 2-ethyl-1-butene             | -54.1   |        | -55.98             | -1.88     | 1.88               |
| 2,3-dimethyl-1-butene        | -61.88  | -64    | -61.08             | 0.80      | 0.8                |
| averaged absolute difference |         |        |                    |           | 1.21               |

Table S14. Experimental and model values for alkynes. All values in kJ/mol. <sup>i</sup> For explanation see text. The Rossini data originate from Ref. [25]. Model values are compared to Rossini's data and if not available with NIST data.

| <b>1-alkynes</b>                | Rossini              | NIST              | model $\Delta H_f$ | model-exp | ABS<br>(model-exp) |
|---------------------------------|----------------------|-------------------|--------------------|-----------|--------------------|
| ethyne                          | 226.9                |                   | 229                | 2.1       | 2.1                |
| 1-propyne                       | 185.6                | 185.4             | 186.64             | 1.04      | 1.04               |
| 1-butyne                        | 166.2                | 166               | 166.01             | -0.19     | 0.19               |
| 1-pentyne                       | 144.45               | 144.3             | 145.38             | 0.93      | 0.93               |
| 1-hexyne                        |                      | 122.3             | 124.75             | 2.45      | 2.45               |
| 1-heptyne                       |                      | 103               | 104.12             | 1.12      | 1.12               |
| 1-octyne                        |                      | 80.7              | 83.49              | 2.79      | 2.79               |
| 1-nonyne                        |                      | 62.3              | 62.86              | 0.56      | 0.56               |
| 1-decyne                        |                      | 41.9              | 42.23              | 0.33      | 0.33               |
| 3-methyl-1-butyne               | 136.5                |                   | 140.28             | 3.78      | 3.78               |
| averaged absolute difference    |                      |                   |                    |           | 1.53               |
| <b>2-, 3-, 4- and 5-alkynes</b> | Rossini <sup>i</sup> | NIST <sup>i</sup> | model $\Delta H_f$ | model-exp | ABS<br>(model-exp) |
| 2-butyne                        | 145                  | 145-148           | 144.28             | -0.72     | 0.72               |
| 2-pentyne                       | 128.95               | 128.9             | 123.65             | -5.25     | 5.25               |
| 3-hexyne                        |                      | 105.4             | 103.02             | -2.38     | 2.38               |
| 3-heptyne                       |                      | 82.8              | 82.39              | -0.41     | 0.41               |
| 3-octyne                        |                      | 62.5              | 61.76              | -0.74     | 0.74               |
| 2-octyne                        |                      | 63.8              | 61.76              | -2.04     | 2.04               |
| 4-octyne                        |                      | 60.1              | 61.76              | 1.66      | 1.66               |
| 3-nonyne                        |                      | 42                | 41.13              | -0.87     | 0.87               |
| 4-decyne                        |                      | 19.9              | 20.5               | 0.6       | 0.6                |
| 2-decyne                        |                      | 23.6              | 20.5               | -3.1      | 3.1                |
| 5-decyne                        |                      | 18.7              | 20.5               | 1.8       | 1.8                |
| averaged absolute difference    |                      |                   |                    |           | 1.78               |

Table S15. Experimental and model values for the primary amines. All values in kJ/mol. The differences between model and experimental data are based on the Rossini value for ethylamine [24, page 623], NIST values when available, and otherwise CAPEC data base values. The averaged absolute difference is 1.20 kJ/mol without taking into account methylamine, for explanation see text.

| <b>n-alkylamines</b>                | Rossini | NIST          | model $\Delta H_f$ | model-exp    | ABS<br>(model-exp) |
|-------------------------------------|---------|---------------|--------------------|--------------|--------------------|
| <b><i>methylamine</i></b>           |         | <b>-23.50</b> | <b>-29.36</b>      | <b>-5.86</b> | <b>5.86</b>        |
| ethylamine                          | -48.57  |               | -49.99             | -1.42        | 1.42               |
| propylamine                         |         | -70.00        | -70.62             | -0.62        | 0.62               |
| butylamine                          |         | -95.00        | -91.25             | 3.75         | 3.75               |
| pentylamine                         |         |               | -111.88            | 1.12         | 1.12               |
| hexylamine                          |         |               | -132.51            | 0.79         | 0.79               |
| heptylamine                         |         |               | -153.14            | 0.86         | 0.86               |
| octylamine                          |         | -173.50       | -173.77            | -0.27        | 0.27               |
| nonamine                            |         |               | -194.40            | 0.80         | 0.80               |
| <b>averaged absolute difference</b> |         |               |                    |              | <b>1.20</b>        |

Table S16. Experimental and model values for substituted benzenes. Experimental data from Rossini et al. [28, 29]. (a) Benzene and mono-alkylbenzenes. Evaluation of (model-exp) using experimental data from Rossini et al., if not available NIST (only benzene, (1-methylethyl)). (b) Di-alkylbenzenes. Experimental data from Rossini et al., if not available NIST (only ethyltoluene), and otherwise the CAPEC data base. (c). Tri-alkylbenzenes. Experimental data from Rossini et al., if not available from the CAPEC data base. (d) Tetra-alkylbenzenes. Experimental data from Rossini et al.

(a)

| <b>Mono-alkyl substituted benzenes</b>         | Rossini | Rossini incr. | NIST  | model $\Delta H_f$ | model-exp | ABS (model-exp) |
|------------------------------------------------|---------|---------------|-------|--------------------|-----------|-----------------|
| benzene                                        | 82.99   |               | 82.9  | 84.5               | 1.51      | 1.51            |
| methylbenzene (toluene)                        | 50.08   | -32.91        | 50    | 48.14              | -1.94     | 1.94            |
| benzene, (1-methylethyl)-                      |         |               | 3.9   | 1.78               | -2.12     | 2.12            |
| benzene, (1-methylpropyl)- (=sec-Butylbenzene) | -17.5   |               | -17.4 | -14.85             | 2.65      | 2.65            |
| benzene, ethyl-                                | 29.8    | -20.28        |       | 27.51              | -2.29     | 2.29            |
| benzene, propyl                                | 7.83    | -21.97        | 7.8   | 6.88               | -0.95     | 0.95            |
| benzene, butyl-                                | -13.82  | -21.65        | -13   | -13.75             | 0.07      | 0.07            |
| benzene, pentyl-                               | -34.46  | -20.64        |       | -34.38             | 0.08      | 0.08            |
| benzene, hexyl-                                | -55.05  | -20.59        |       | -55.01             | 0.04      | 0.04            |
| benzene, heptyl-                               | -75.70  | -20.65        |       | -75.64             | 0.06      | 0.06            |
| benzene, octyl-                                | -96.30  | -20.60        |       | -96.27             | 0.03      | 0.03            |
| benzene, nonyl-                                | -116.94 | -20.64        |       | -116.9             | 0.04      | 0.04            |
| benzene, decyl                                 | -137.58 | -20.64        |       | -137.53            | 0.05      | 0.05            |
| benzene, n-undecyl                             | -158.18 | -20.60        |       | -158.16            | 0.02      | 0.02            |
| benzene, dodecyl                               | -178.83 | -20.64        |       | -178.79            | 0.04      | 0.04            |
| tridecylbenzene                                | -199.43 | -20.60        |       | -199.42            | 0.01      | 0.01            |
| benzene, tetradecyl-                           | -220.1  | -20.67        |       | -220.05            | 0.05      | 0.05            |
| n-hexadecylbenzene                             | -261.31 | -20.61        |       | -261.31            | 0.00      | 0.00            |
| isobutylbenzene                                | -21.6   |               |       | -18.85             | 2.75      | 2.75            |
| tert-butylbenzene                              | -22.7   |               |       | -18.85             | 3.85      | 3.85            |
| <b>averaged absolute difference</b>            |         |               |       |                    |           | <b>0.88</b>     |

(b)

| Di-substituted alkylbenzenes         | Rossini | NIST | model $\Delta H_f$ | model-exp | ABS<br>(model-exp) |
|--------------------------------------|---------|------|--------------------|-----------|--------------------|
| benzene, 1,2-dimethyl                | 19      | 19   | 18.28              | -0.72     | 0.72               |
| benzene, 1,3-dimethyl                | 17.3    | 17.2 | 18.28              | 0.98      | 0.98               |
| benzene, 1,4-dimethyl                | 18      | 17.9 | 18.28              | 0.28      | 0.28               |
| benzene, 1,2-diethyl-                | -19     |      | -22.98             | -3.98     | 3.98               |
| benzene, 1,3-diethyl-                | -21.9   |      | -22.98             | -1.08     | 1.08               |
| benzene, 1,4-diethyl-                | -22.3   |      | -22.98             | -0.68     | 0.68               |
| benzene, 1-methyl-3-propyl-          |         |      | -22.98             | 1.16      | 1.16               |
| benzene, 1,3-bis(1-methylethyl)-     |         |      | -74.44             | 3.16      | 3.16               |
| benzene, 1-methyl-4-(1-methylethyl)- |         |      | -28.08             | 0.92      | 0.92               |
| benzene, 1-methyl-2-propyl-          | -21.6   |      | -22.98             | -1.38     | 1.38               |
| benzene, 1-methyl-4-propyl-          | -25     |      | -22.98             | 2.02      | 2.02               |
| benzene, 1-methyl-3-ethyl-           | -1.9    |      | -2.35              | -0.45     | 0.45               |
| benzene, 1-methyl-2-ethyl-           | 1.2     |      | -2.35              | -3.55     | 3.55               |
| benzene, 1-methyl-4-ethyl-           | -3.3    |      | -2.35              | 0.95      | 0.95               |
| benzene, 1-Methyl-2-Isopropyl        | -25.5   |      | -28.08             | -2.58     | 2.58               |
| m-ethyltoluene                       |         | -1.9 | -2.35              | -0.45     | 0.45               |
| averaged absolute difference         |         |      |                    |           | 1.52               |

( c )

| <b>Tri-substituted alkylbenzenes</b> | Rossini | model $\Delta H_f$ | model-exp | ABS<br>(model-exp) |
|--------------------------------------|---------|--------------------|-----------|--------------------|
| benzene, 2-ethyl-1,3-dimethyl-       | -29.8   | -33.21             | -3.41     | 3.41               |
| benzene, 1-ethyl-2,4-dimethyl-       |         | -33.21             | -2.41     | 2.41               |
| benzene, 1-ethyl-3,5-dimethyl-       | -35.6   | -33.21             | 2.39      | 2.39               |
| benzene, 1,2,4-trimethyl-            | -13.9   | -12.58             | 1.32      | 1.32               |
| benzene, 1,2,3-trimethyl-            | -9.6    | -12.58             | -2.98     | 2.98               |
| benzene, 1,3,5-trimethyl-            |         | -12.58             | 3.32      | 3.32               |
| 1,1'-biphenyl, 4,4'-dimethyl-        |         | 114.28             | 2.98      | 2.98               |
| benzene, 2-ethyl-1,4-dimethyl-       |         | -33.21             | -1.03     | 1.03               |
| benzene, 4-ethyl-1,2-dimethyl-       |         | -33.21             | -1.12     | 1.12               |
| <b>averaged absolute difference</b>  |         |                    |           | <b>2.33</b>        |

(d)

| <b>Tetra-substituted alkylbenzenes</b> | Rossini | model $\Delta H_f$ | model-exp | ABS<br>(model-exp) |
|----------------------------------------|---------|--------------------|-----------|--------------------|
| benzene, 1,2,3,5-tetramethyl-          | -44.85  | -44.94             | -0.09     | 0.09               |
| benzene, 1,2,3,4-tetramethyl-          | -41.95  | -44.94             | -2.99     | 2.99               |
| benzene, 1,2,4,5-tetramethyl-          | -45.3   | -44.94             | 0.36      | 0.36               |
| <b>averaged absolute difference</b>    |         |                    |           | <b>1.15</b>        |

Table S17. Experimental and model values for substituted naphthalenes. All values in kJ/mol. Experimental data from Rossini et al. [29], if not available from the CAPEC data base. The model value for naphthalene equals the Rossini experimental value as naphthalene is taken as a Group itself.

| <b>Naphthalenes</b>                 | Rossini c.s. | NIST  | model $\Delta H_f$ | model-exp | ABS<br>(model-exp) |
|-------------------------------------|--------------|-------|--------------------|-----------|--------------------|
| naphthalene                         | 151.78       | 150,6 |                    |           |                    |
| naphthalene, 1-methyl-              | 116.94       | 116.1 | 115.44             | -1.46     | 1.46               |
| naphthalene, 2-methyl-              | 116.19       |       | 115.44             | -0.66     | 0.66               |
| naphthalene, 2,7-dimethyl           |              |       | 85.58              | 1.78      | 1.78               |
| 1-ethylnaphthalene                  |              |       | 94.81              | -2.09     | 2.09               |
| 2,6-dimethylnaphthalene             |              |       | 85.58              | 1.61      | 1.61               |
| <b>averaged absolute difference</b> |              |       |                    |           | <b>1.52</b>        |
